# Supplementary material for: Climate change is associated with higher phytoplankton biomass and longer blooms in the West Antarctic Peninsula
Source: Springer Nature journal article supplement (doi:10.1038/s41467-024-50381-2), 2024-08-02
Supplement: 41467_2024_50381_MOESM1_ESM.pdf [file 41467_2024_50381_MOESM1_ESM.pdf]

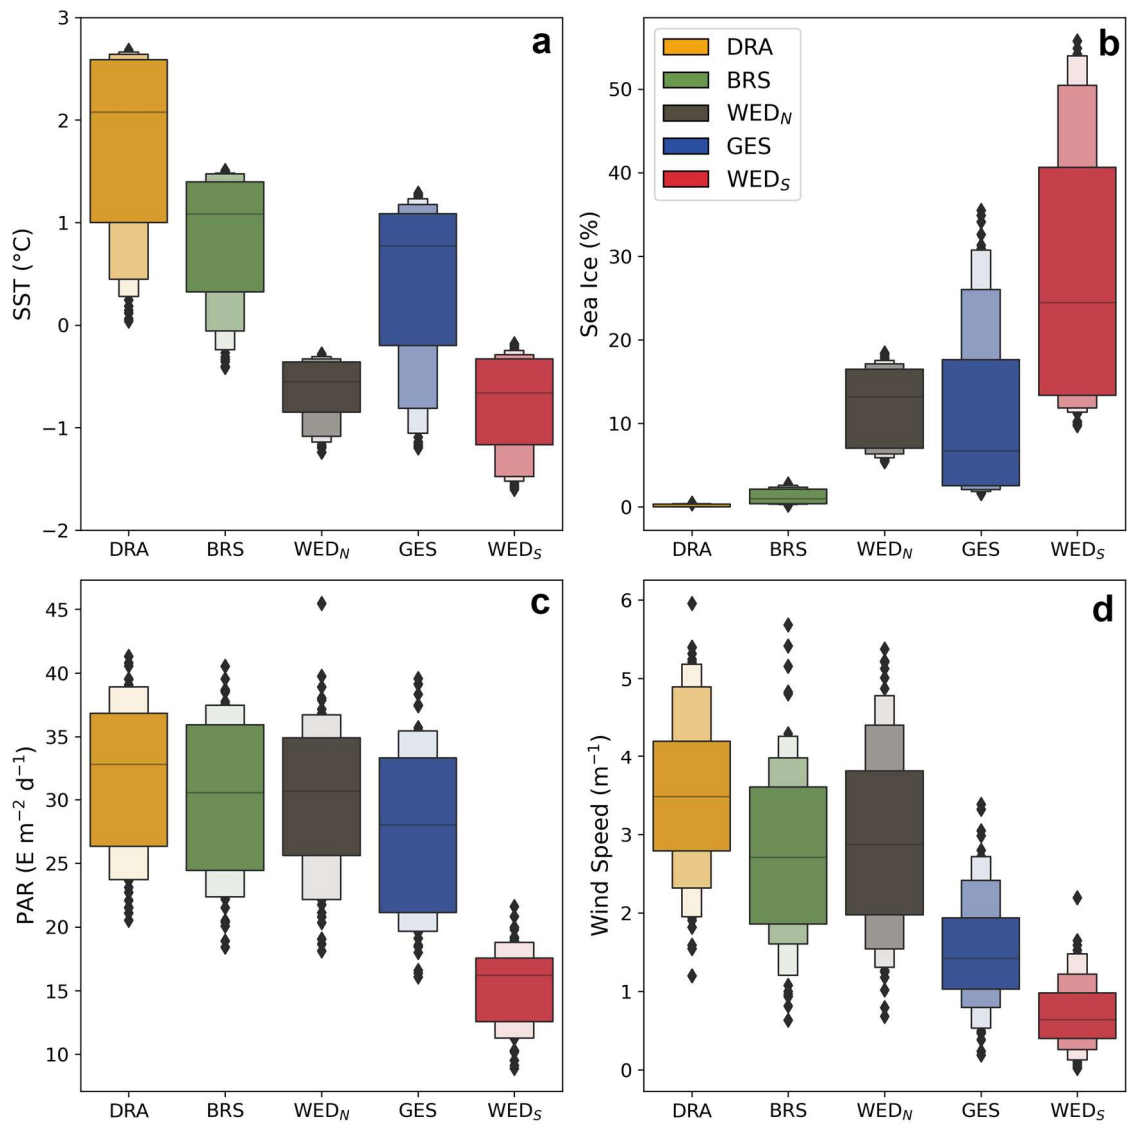

**Sup. Fig. 1 | Summary of summer environmental conditions across the Antarctic Peninsula.** Letter-value plots for of sea surface temperature (SST; °C) (a), sea ice concentration (%) (b), photosynthetically active radiation (PAR; E m<sup>-2</sup> d<sup>-1</sup>) (c), and wind speed (ms<sup>-1</sup>) (d) values in the summer (December-February) during 1998-2022 for each region. The center line of the box plots correspond to the median.

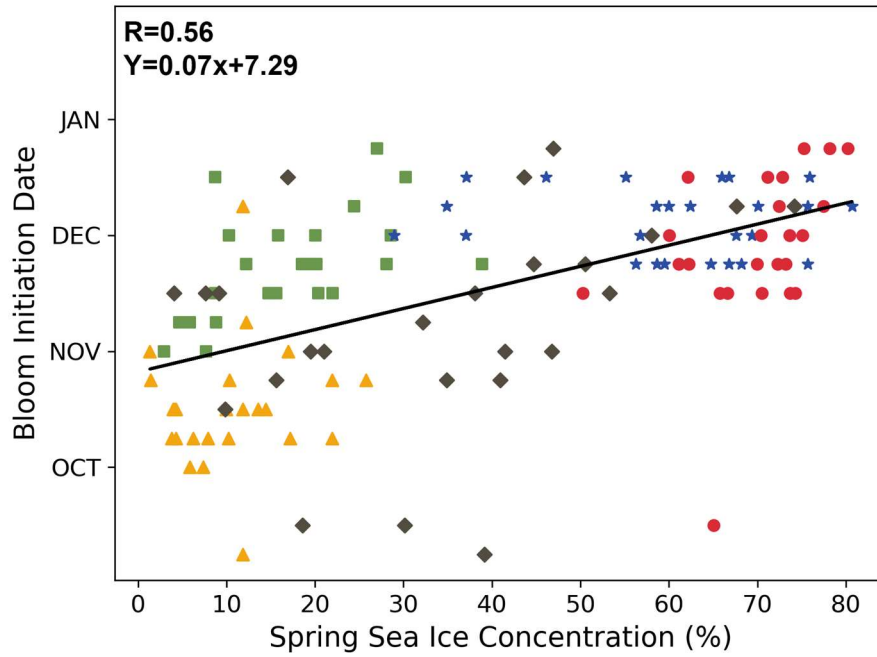

**Sup. Fig. 2 | Linear relationship between bloom initiation timing and spring sea ice concentration.** Linear regression between the phytoplankton bloom initiation date and the mean spring (September-November) sea ice concentration (%) during 1998-2022 for each region. The relationship is statistically significant (N=125; p-val<0.05).

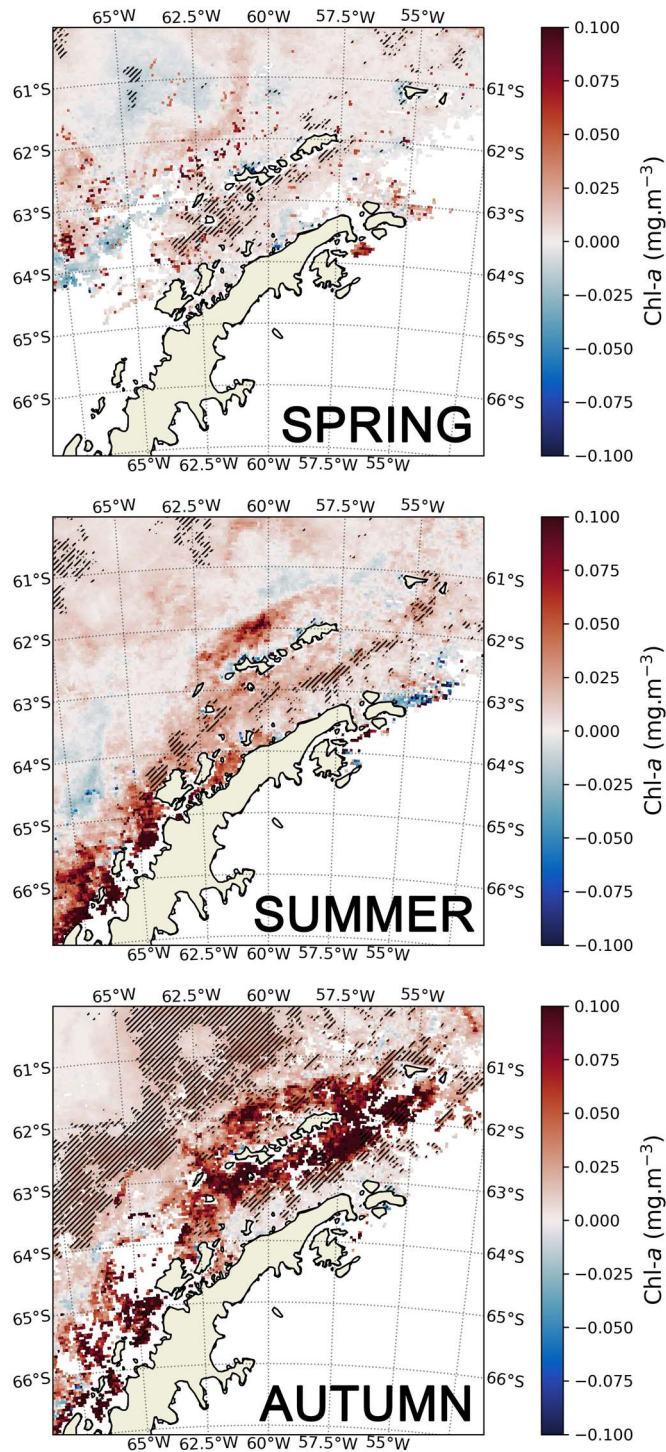

**Sup. Fig. 3 | Satellite phytoplankton biomass increasing trends in the West Antarctic Peninsula.** Calculated change in satellite-derived chlorophyll-*a* per year ( $\text{mg m}^{-3} \text{ year}^{-1}$ ) during spring (September-November), summer (December-February) and early spring (March-April) along the Antarctic Peninsula between 1998-2022. Oblique black lines represent the areas with statistically significant changes ( $p\text{-value} < 0.05$ ).

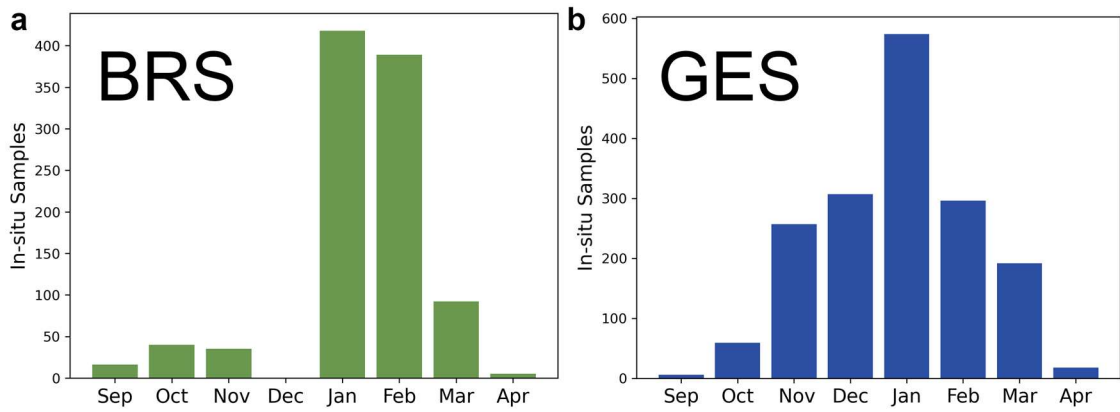

**Sup. Fig. 4 | Seasonal distribution of in-situ samples showed in Figure 3b.** Number of in-situ surface chlorophyll-a observations sampled each region (BRS: panel a; GES: panel b) and in each month between September and April 1998-2022.

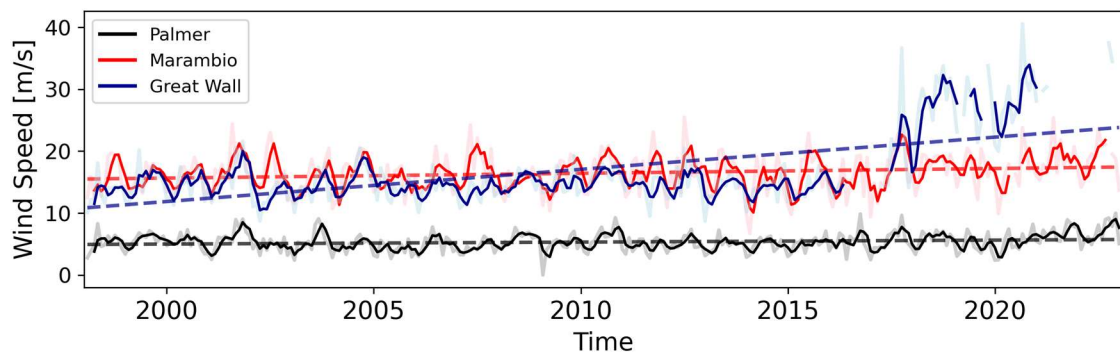

**Sup. Fig. 5 | Linear trend in atmospheric wind speed during 1998-2022 in three stations in the Antarctic Peninsula (Palmer, Marambio and Great Wall).** Full lines represent the 6-month moving averages of the monthly-averaged wind speed measured at Palmer ( $64^{\circ}46'27''\text{S}$   $64^{\circ}03'10''\text{W}$ ; black), Marambio ( $64^{\circ}14'28''\text{S}$   $56^{\circ}37'36''\text{W}$ ; red), and Great Wall ( $62^{\circ}13'01''\text{S}$   $58^{\circ}57'43''\text{W}$ ; blue) Stations. For each station, the shaded lines in background are the raw monthly-averaged wind speed. The dashed lines indicate the linear trend for each station, as follows: Palmer ( $y=0.003x + 4.93$ ;  $R=0.15$ ,  $p\text{-value}<0.01$ ), Marambio ( $y=0.006x + 15.50$ ;  $R=0.18$ ,  $p\text{-value}<0.01$ ), Great Wall ( $y=0.04x + 10.83$ ,  $R=0.60$ ,  $p\text{-value}<0.01$ ).

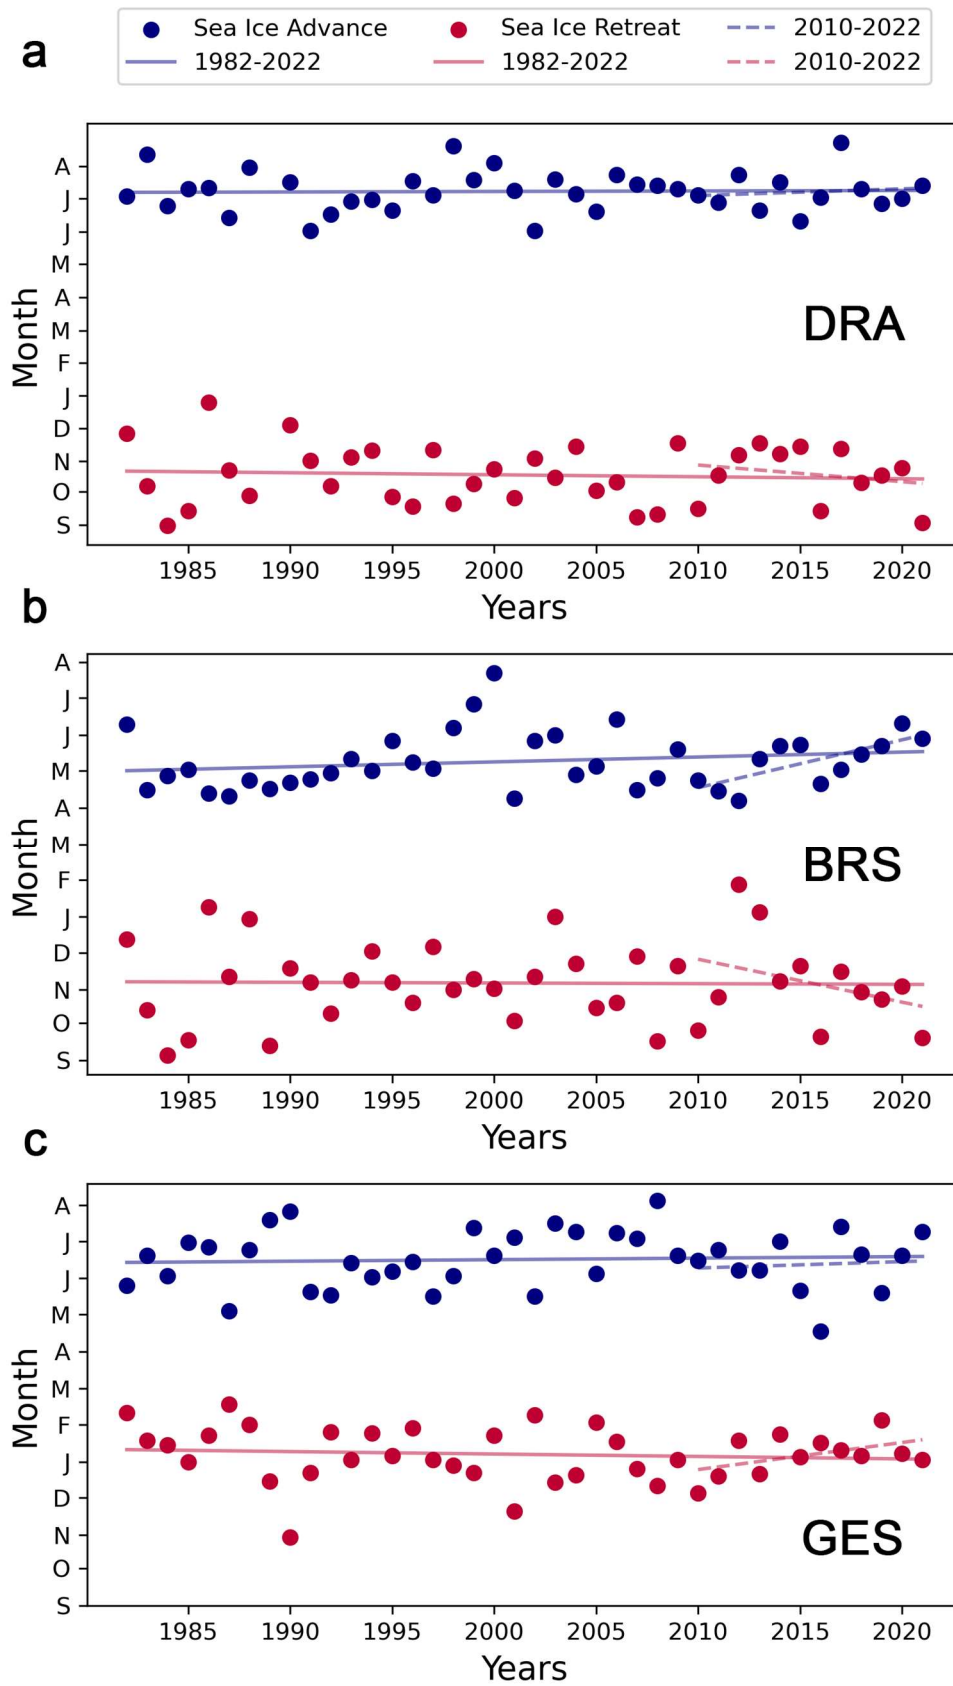

**Sup. Fig. 6 | Trends in sea ice phenology across the Western Antarctic Peninsula.** Interannual variability of Sea Ice Advance (blue) and Retreat (red) dates for the regions of the WAP - DRA (a), BRS (b) and GES (c) - during 1980 to 2022. Full lines correspond to the linear

regression for the 1982-2022 period, while the dashed lines correspond to the 2010-2022 period. These regions were chosen since they were the only ones that exhibited trends in biomass and/or bloom phenology (see Tables 1 and 2).

**Sup. Table 1 | Statistical summary of summer chlorophyll-a and bloom phenology metrics during 1998-2022 for each region identified.** CMean: mean December-February chlorophyll-a (Chl-*a*; mg m<sup>-3</sup>) mean, C<sub>max</sub>: Chl-a max, BPeak: Bloom Peak Date, Binit: Bloom Initiation Date, BTerm: Bloom Termination Date, BDur: Bloom Duration (weeks), BMag: Bloom Magnitude (mg m<sup>-3</sup>; Simpson integrated Chl-a during the period of the bloom). For bloom phenology metrics, the standard deviation is always expressed in weeks. Note that BPeak, Binit and BTerm dates correspond to 8-day weeks, not individual days.

| DRA              | Chl- <i>a</i> | BPeak    | BInit    | BTerm         | BDur | BMag  |
|------------------|---------------|----------|----------|---------------|------|-------|
| Mean             | 0.34          | 06/Dec   | 19/Oct   | 16/Feb        | 16   | 6.19  |
| Min              | 0.05          | 19/Oct   | 09/Sep   | 14/Dec        | 8    | 2.09  |
| Max              | 1.54          | 05/Apr   | 14/Dec   | 13/Apr        | 27   | 10.25 |
| STDev            | 0.28          | 6        | 2        | 5             | 5    | 2     |
| P10              | 0.11          | -        | -        | -             | 9    | 3.10  |
| P90              | 0.74          | -        | -        | -             | 22   | 8.27  |
| Mode             | -             | November | October  | March         | -    | -     |
| BRS              | Chl- <i>a</i> | BPeak    | BInit    | BTerm         | BDur | BMag  |
| Mean             | 0.96          | 23/Jan   | 28/Nov   | 12/Mar        | 14   | 13.16 |
| Min              | 0.06          | 20/Nov   | 04/Nov   | 15/Jan        | 9    | 6.19  |
| Max              | 4.26          | 20/Mar   | 30/Dec   | 05/Apr        | 20   | 26.44 |
| STDev            | 0.57          | 5        | 2        | 2             | 2    | 4.20  |
| P10              | 0.40          | -        | -        | -             | 12   | 9     |
| P90              | 1.59          | -        | -        | -             | 17   | 18.36 |
| Mode             | -             | December | November | March         | -    | -     |
| WED <sub>N</sub> | Chl- <i>a</i> | BPeak    | BInit    | BTerm         | BDur | BMag  |
| Mean             | 0.78          | 14/Dec   | 12/Nov   | 16/Feb        | 13   | 9.94  |
| Min              | 0.01          | 03/Oct   | 09/Sep   | 14/Dec        | 5    | 3.09  |
| Max              | 5.58          | 04/Mar   | 30/Dec   | 28/Mar        | 24   | 20.25 |
| STDev            | 0.68          | 4        | 4        | 3             | 4    | 4.35  |
| P10              | 0.28          | -        | -        | -             | 9    | 4.80  |
| P90              | 1.55          | -        | -        | -             | 16   | 14.68 |
| Mode             | -             | December | November | January/March | -    | -     |

**Sup. Table 1 (Cont.) | Statistical summary of summer chlorophyll-a and bloom phenology metrics during 1998-2022 for each region identified.** CMean: mean December-February chlorophyll-a (Chl-*a*; mg m<sup>-3</sup>) mean, C<sub>max</sub>: Chl-a max, BPeak: Bloom Peak Date, Binit: Bloom Initiation Date, BTerm: Bloom Termination Date, BDur: Bloom Duration (weeks), BMag: Bloom Magnitude (mg m<sup>-3</sup>; Simpson integrated Chl-a during the period of the bloom). For bloom phenology metrics, the standard deviation is expressed in 8-day weeks. Note that BPeak, Binit and BTerm dates correspond to 8-day weeks, not individual days.

| GES   | Chl- <i>a</i> | BPeak    | BInit    | BTerm  | BDur | BMag   |
|-------|---------------|----------|----------|--------|------|--------|
| Mean  | 2.11          | 31/Jan   | 06/Dec   | 12/Mar | 13   | 28.30  |
| Min   | 0.08          | 22/Dec   | 28/Nov   | 08/Feb | 9    | 9.78   |
| Max   | 12.14         | 20/Mar   | 22/Dec   | 28/Mar | 15   | 77.08  |
| STDev | 1.94          | 3        | 1        | 1      | 2    | 17.24  |
| P10   | 0.68          | -        | -        | -      | 10   | 14.02  |
| P90   | 4.41          | -        | -        | -      | 15   | 53.52  |
| Mode  | -             | January  | December | March  | -    | -      |
| WEDs  | Chl- <i>a</i> | BPeak    | BInit    | BTerm  | BDur | BMag   |
| Mean  | 7.81          | 23/Jan   | 06/Dec   | 04/Mar | 12   | 94.54  |
| Min   | 0.09          | 12/Nov   | 17/Sep   | 31/Jan | 6    | 9.30   |
| Max   | 35.68         | 28/Mar   | 31/Jan   | 28/Mar | 20   | 183.23 |
| STDev | 8.30          | 4        | 3        | 2      | 3    | 54.70  |
| P10   | 0.57          | -        | -        | -      | 10   | 21.18  |
| P90   | 21.27         | -        | -        | -      | 15   | 168.02 |
| Mode  | -             | December | December | March  | -    | -      |



**Sup. Table 2 | Statistical summary of the summer environmental conditions during 1998-2022 for each region identified.** SST: sea surface temperature (°C), Sea Ice: sea ice concentration (%), PAR: photosynthetically active radiation ( $E\ m^{-2}\ d^{-1}\ year^{-1}$ ), Wind Speed ( $m\ s^{-1}$ ). Summer corresponds to December-February.

| DRA              | SST (°C) | Sea Ice (%) | PAR ( $E\ m^{-2}\ d^{-1}\ year^{-1}$ ) | Wind speed ( $m\ s^{-1}$ ) |
|------------------|----------|-------------|----------------------------------------|----------------------------|
| Mean             | 1.73     | 0.13        | 34.38                                  | 6.23                       |
| Min              | -0.65    | 0           | 7.68                                   | 0.04                       |
| Max              | 4.49     | 7.31        | 64.92                                  | 15.33                      |
| STDev            | 1.03     | 0.72        | 10.56                                  | 2.89                       |
| P10              | 0.33     | 0           | 20.98                                  | 2.74                       |
| P90              | 3.03     | 0.07        | 48.88                                  | 10.39                      |
| BRS              | SST (°C) | Sea Ice (%) | PAR ( $E\ m^{-2}\ d^{-1}\ year^{-1}$ ) | Wind speed ( $m\ s^{-1}$ ) |
| Mean             | 0.84     | 1.20        | 33.19                                  | 6.01                       |
| Min              | -0.97    | 0.01        | 6.15                                   | 0.21                       |
| Max              | 2.34     | 14.20       | 63.12                                  | 15.06                      |
| STDev            | 0.68     | 2.29        | 10.19                                  | 2.73                       |
| P10              | -0.18    | 0.05        | 19.98                                  | 2.55                       |
| P90              | 1.62     | 3.67        | 47.05                                  | 9.70                       |
| WED <sub>N</sub> | SST (°C) | Sea Ice (%) | PAR ( $E\ m^{-2}\ d^{-1}\ year^{-1}$ ) | Wind speed ( $m\ s^{-1}$ ) |
| Mean             | -0.63    | 11.97       | 33.38                                  | 6.39                       |
| Min              | -1.67    | 0           | 5.40                                   | 0.06                       |
| Max              | 0.53     | 81.50       | 64.71                                  | 16.06                      |
| STDev            | 0.49     | 17.38       | 12.55                                  | 3.07                       |
| P10              | -1.35    | 0.28        | 17.80                                  | 2.44                       |
| P90              | -0.01    | 40.83       | 51.85                                  | 10.61                      |

**Sup. Table 2 (Cont) | Statistical summary of the summer environmental conditions during 1998-2022 for each region identified.** SST: sea surface temperature (°C), Sea Ice: sea ice concentration (%), PAR: photosynthetically active radiation ( $E\ m^{-2}\ d^{-1}\ year^{-1}$ ), Wind Speed ( $m\ s^{-1}$ ). Summer corresponds to December-February.

| GES   | SST (°C) | Sea Ice (%) | PAR ( $E\ m^{-2}\ d^{-1}\ year^{-1}$ ) | Wind speed ( $m\ s^{-1}$ ) |
|-------|----------|-------------|----------------------------------------|----------------------------|
| Mean  | 0.42     | 10.98       | 29.80                                  | 4.66                       |
| Min   | -1.59    | 0.06        | 2.10                                   | 0.05                       |
| Max   | 2.82     | 81.02       | 64.66                                  | 14.57                      |
| STDev | 0.95     | 15.49       | 14.21                                  | 2.50                       |
| P10   | -1.00    | 0.96        | 12.70                                  | 1.57                       |
| P90   | 1.54     | 33.44       | 51.60                                  | 8.11                       |
| WEDs  | SST (°C) | Sea Ice (%) | PAR ( $E\ m^{-2}\ d^{-1}\ year^{-1}$ ) | Wind speed ( $m\ s^{-1}$ ) |
| Mean  | -0.76    | 27.84       | 16.39                                  | 2.79                       |
| Min   | -1.80    | 0.02        | 1.60                                   | 0.04                       |
| Max   | 1.57     | 80.82       | 55.53                                  | 9.78                       |
| STDev | 0.64     | 22.25       | 9.87                                   | 1.62                       |
| P10   | -1.58    | 1.54        | 5.92                                   | 0.91                       |
| P90   | 0.02     | 61.77       | 29.89                                  | 5.02                       |

**Sup. Table 3 | Summary of the biological and environmental variables used in this work.** Full names and detailed information on each product can be found in the Methods section. SST: sea surface temperature (°C), Sea Ice: sea ice concentration (%), PAR: photosynthetically active radiation ( $E\ m^{-2}\ d^{-1}\ year^{-1}$ ), Wind Speed ( $m\ s^{-1}$ ).

| Variable                          | Units                          | Product/Source                    | Temporal Coverage | Spatial Resolution | Reference |
|-----------------------------------|--------------------------------|-----------------------------------|-------------------|--------------------|-----------|
| Chlorophyll- <i>a</i> (satellite) | $mg\ m^{-3}$                   | ESA-CCI 6.0                       | 1998-2022         | 4 km               | 1, 2      |
| Chlorophyll- <i>a</i> (in-situ)   | $mg\ m^{-3}$                   | GOAL, PALMER-LTER, Valente et al. | 1998-2020         | -                  | 3, 4, 5   |
| Sea Surface Temperature           | °C                             | OSTIA-L4                          | 1998-2022         | 5 km               | 6         |
| Sea Ice Concentration             | %                              | OSTIA-L4                          | 1982-2022         | 5 km               | 6         |
| PAR                               | $E\ m^{-2}\ d^{-1}\ year^{-1}$ | NASA Globcolour                   | 1998-2022         | ~8 km              | 7, 8      |
| Wind Speed                        | $m\ s^{-1}$                    | ERA5 Reanalysis                   | 1998-2022         | ~25 km             | 9         |
| SAM                               | unitless                       | NOAA NCEP CPC                     | 1998-2022         | ~8 km              | 10        |

\*The meridional and zonal components of wind were acquired to calculate Wind Speed.

<sup>1</sup>Sathyendranath et al. 2019

<sup>2</sup>Ocean Colour Climate Change Initiative dataset, Version 6.0, European Space Agency, available online at <http://www.esa-oceancolour-cci.org/>.

<sup>3</sup>Palmer Station Antarctica LTER et al. 2022.

<sup>4</sup>Palmer Station Antarctica LTER et al. 2022.

<sup>5</sup>Valente et al. 2022.

<sup>6</sup>Good et al. 2020.

<sup>7</sup>Maritorena et al. 2010.

<sup>8</sup>Frouin et al. 2003.

<sup>9</sup>Hersbach et al. 2020.

<sup>10</sup>NOAA Monthly mean AO Index since January 1950, available at <https://www.cpc.ncep.noaa.gov/>.

**Sup. Table 4 | P-values associated with the analysis of the yearly change in satellite-derived phytoplankton biomass within each month along the Antarctic Peninsula during 1998-2022 (Table 1).** For each region, the p-value associated with the yearly linear change ( $\text{mg m}^{-3} \text{ year}^{-1}$ )

<sup>1</sup>; slope of linear regression) in the spatially integrated mean chlorophyll-*a* is presented for each month between September and April, as well as for spring (September-November), summer (December-February), autumn (March-April) and full season (September-April). Bold \*, \*\*, and \*\*\* correspond to p-value<0.1, p-value<0.05, and p-value<0.01, respectively (a Pearson correlation test with a two-sided alternative hypothesis was used).

| Period evaluated | DRA             | BRS             | WED <sub>N</sub> | GES             | WED <sub>S</sub> |
|------------------|-----------------|-----------------|------------------|-----------------|------------------|
| September        | <b>0.010**</b>  | <b>0.001***</b> | 0.649            | 0.211           | <b>0.085*</b>    |
| October          | <b>0.077*</b>   | <b>0.061*</b>   | 0.201            | 0.140           | 0.312            |
| November         | 0.929           | 0.300           | 0.761            | 0.170           | 0.971            |
| December         | 0.416           | 0.407           | 0.257            | <b>0.094*</b>   | 0.147            |
| January          | 0.152           | 0.427           | 0.416            | 0.274           | 0.565            |
| February         | 0.123           | 0.145           | 0.477            | 0.395           | 0.231            |
| March            | <b>0.040**</b>  | <b>0.006***</b> | <b>0.032**</b>   | <b>0.005***</b> | <b>0.085*</b>    |
| April            | <b>0.007***</b> | <b>0.001***</b> | <b>0.085*</b>    | -               | -                |
| Spring           | 0.503           | <b>0.020**</b>  | 0.268            | 0.150           | 0.682            |
| Summer           | 0.140           | 0.224           | 0.427            | 0.192           | 0.101            |
| Autumn           | <b>0.013**</b>  | <b>0.002***</b> | <b>0.017**</b>   | <b>0.006***</b> | <b>0.068*</b>    |
| September-April  | <b>0.068*</b>   | <b>0.019**</b>  | 0.156            | 0.104           | 0.111            |

**Sup. Table 5 | P-values associated with the analysis of the yearly change in phytoplankton bloom phenology along the Antarctic Peninsula during 1998-2022 (Table 2).** For each region, the p-value associated with the yearly linear change (i.e., the slope of linear regression) was estimated for each bloom phenology metric calculated in this work: bloom initiation (weeks year<sup>-1</sup>), bloom termination (weeks year<sup>-1</sup>), bloom peak (weeks

year<sup>-1</sup>), bloom duration (weeks year<sup>-1</sup>), and bloom magnitude (mg m<sup>-3</sup>year<sup>-1</sup>; a measure of the biomass accumulated during the bloom). Bold \*, \*\*, and \*\*\* correspond to p-value<0.1, p-value<0.05, and p-value<0.01, respectively (a Pearson correlation test with a two-sided alternative hypothesis was used).

| Phenology metric  | DRA             | BRS   | GES            |
|-------------------|-----------------|-------|----------------|
| Bloom initiation  | 0.960           | 0.254 | 0.799          |
| Bloom termination | <b>0.001***</b> | 0.471 | <b>0.017**</b> |
| Bloom peak        | 0.573           | 0.394 | 0.832          |
| Bloom duration    | <b>0.002***</b> | 0.866 | <b>0.058*</b>  |

## References

1. Frouin, R. *et al.* The SeaWiFS PAR product. In *Algorithm Updates for the Fourth SeaWiFS Data Reprocessing*, S. B. Hooker and E. R. Firestone, Editors, CC NASA/TM-2003-206892, Vol. **22**, 46-50 (2003).

2. Good, S. *et al.* The current configuration of the OSTIA system for operational production of foundation sea surface temperature and ice concentration analyses. *Remote Sensing*, **12**(4), p.720 (2020).
3. Hersbach, H. *et al.* The ERA5 global reanalysis. *Quarterly Journal of the Royal Meteorological Society*, **146**(730), pp.1999-2049 (2020).
4. Maritorena, S. *et al.* Merged satellite ocean color data products using a bio-optical model: Characteristics, benefits and issues. *Remote Sensing of Environment*, **114**, 1791-1804 (2010).
5. Palmer Station Antarctica LTER *et al.* Photosynthetic pigments of water column samples and analyzed with High Performance Liquid Chromatography (HPLC), collected aboard Palmer LTER annual cruises off the coast of the Western Antarctica Peninsula, 1991 - 2020. ver 9. Environmental Data Initiative. <https://doi.org/10.6073/pasta/9d0c1561ca8c5540227df6efa37c61b5> (2022).
6. Palmer Station Antarctica LTER *et al.* Photosynthetic pigments of water column samples analyzed using High Performance Liquid Chromatography (HPLC), sampled during the Palmer LTER field seasons at Palmer Station, Antarctica, 1991 – 2019. ver 7. Environmental Data Initiative. <https://doi.org/10.6073/pasta/ffeb2f59fe11d8a0dabbb992e6b614e2> (2022).
7. Palmer Station Antarctica LTER and S. Stammerjohn. 2023. Sea ice duration or the time elapse between day of advance and day of retreat within a given sea ice year for the PAL LTER region West of the Antarctic Peninsula derived from passive microwave satellite, 1979 - 2023. ver 8. Environmental Data Initiative (2023).

8. Sathyendranath, S. *et al.* An Ocean-Colour Time Series for Use in Climate Studies: The Experience of the Ocean-Colour Climate Change Initiative (OC-CCI). *Sensors* **19**, 4285 (2019).
9. Valente, A. *et al.* A compilation of global bio-optical in situ data for ocean-colour satellite applications—version three. *Earth System Science Data* **14**, 5737-5770 (2022).
